# Supplementary material for: Novel amino-functionalized hypercrosslinked polymer nanoparticles constructed from commercial macromolecule polystyrene via a two-step strategy for CO2 adsorption
Source: Royal Society of Chemistry journal article supplement (doi:10.1039/d0nj04976j), 2020-01-01
Supplement: d0nj04976j1.pdf [file d0nj04976j1.pdf]

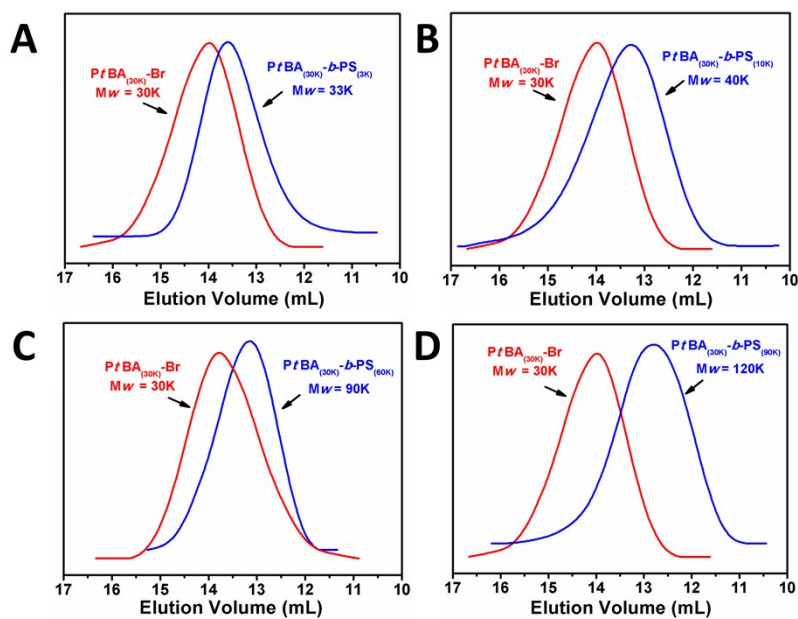

**Figure S1.** (A) GPC traces of PtBA<sub>(30K)</sub>-Br and PtBA<sub>(30K)</sub>-b-PS<sub>(3K)</sub>. (B) GPC traces of PtBA<sub>(30K)</sub>-Br and PtBA<sub>(30K)</sub>-b-PS<sub>(10K)</sub>. (C) GPC traces of PtBA<sub>(30K)</sub>-Br and PtBA<sub>(30K)</sub>-b-PS<sub>(60K)</sub>. (D) GPC traces of PtBA<sub>(30K)</sub>-Br and PtBA<sub>(30K)</sub>-b-PS<sub>(90K)</sub>.

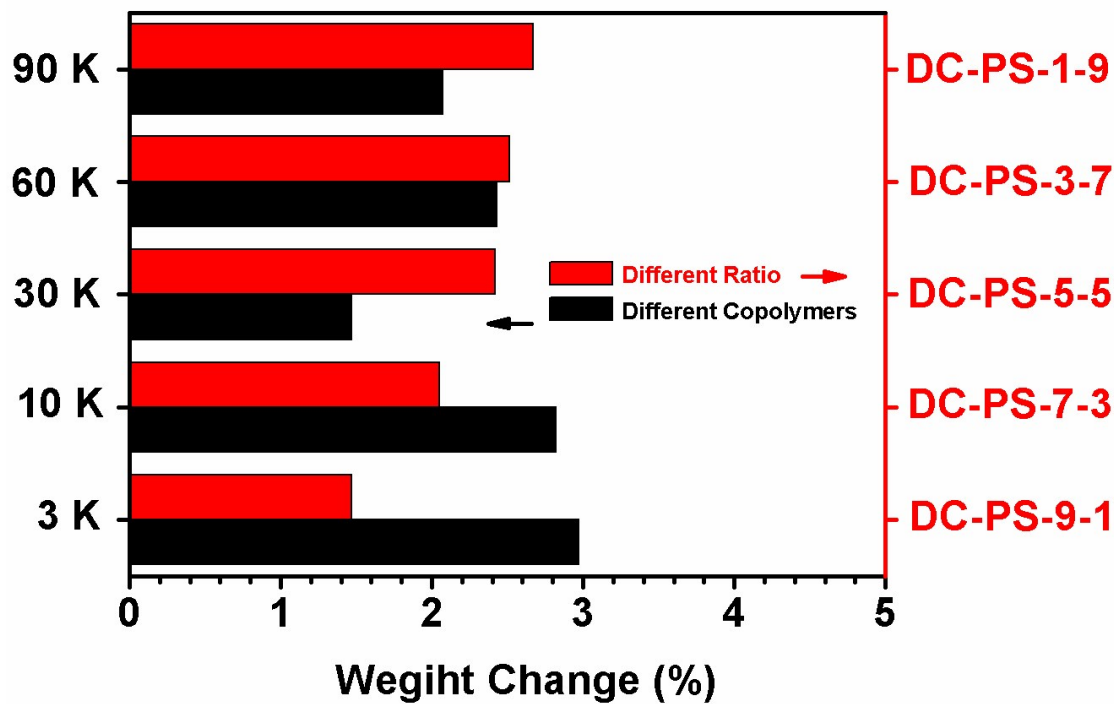

**Figure S2.** CO<sub>2</sub> adsorption capacity tested by TG method of nanoparticles synthesized with different ratio of diblock copolymers to polystyrene or different kinds of diblock copolymers

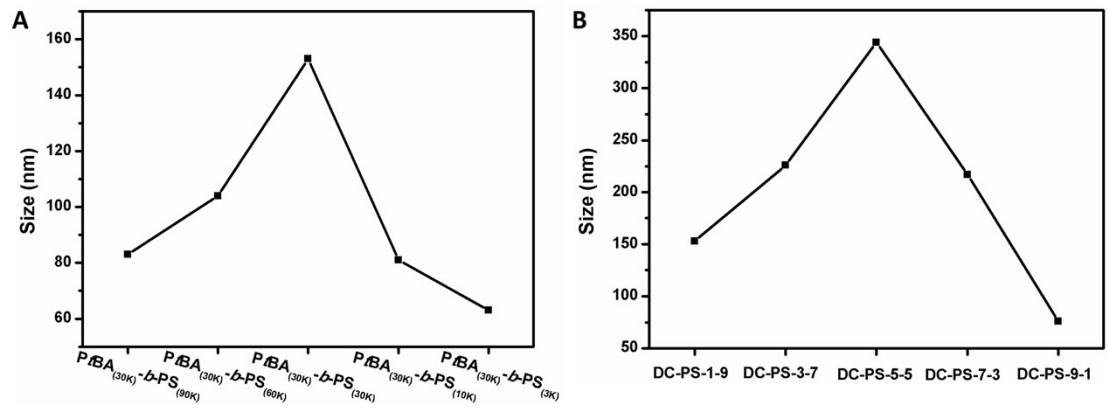

**Figure S3.** Change trend of nanoparticles' size: (A) different diblock copolymer. (B) different mass ratio of copolymer to total polymers.

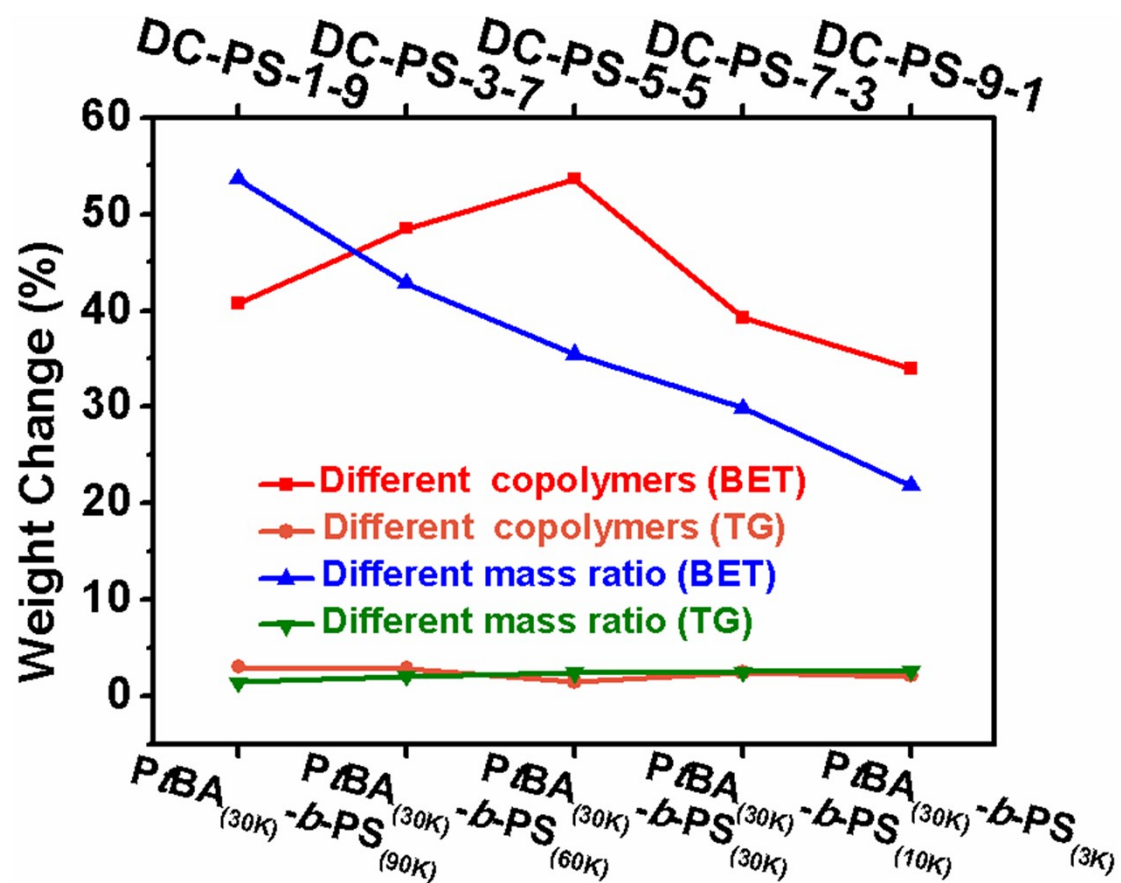

Figure S4. Change trends of CO<sub>2</sub> capture capacities of different AHCNPs in various synthesis condition.

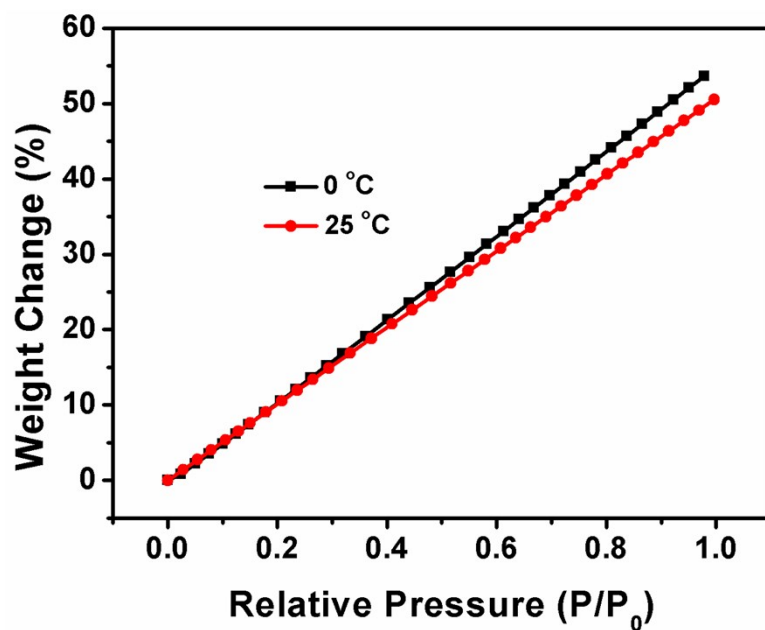

**Figure S5.** CO<sub>2</sub> capture capacity of AHCPNPs (synthesized with PtBA<sub>(30K)</sub>-*b*-PS<sub>(30K)</sub> and 1:9 mass ratio of copolymer to PS) at 25 °C and 0 °C.
